1

2

3

4 **Agroecosystem resilience. A conceptual and**  
5 **methodological framework for evaluation**

6

7

8 Cindy Córdoba<sup>1¶</sup>, Catalina Triviño<sup>2¶</sup>, Javier Toro<sup>2¶\*</sup>

9

10

11 1. Centro Interdisciplinario de Estudios sobre Desarrollo (CIDER), Universidad de los

12 Andes, Bogotá, Colombia

13 2. Instituto de Estudios Ambientales, Universidad Nacional de Colombia, Bogotá, Colombia

14

15

16 \* Corresponding author

17 [jjtoroca@unal.edu.co](mailto:jjtoroca@unal.edu.co) (JT), ORCID: <https://orcid.org/0000-0001-6675-5148>

18

19

20 <sup>¶</sup>These authors contributed equally to this work.

21

## 22 **Abstract**

23           This article proposes a conceptual and methodological framework for analyzing  
24 agroecosystem resilience, which incorporates agrarian structure and peasant community agency.  
25 The methodology is applied to a comparison of two peasant communities in Latin America (Brazil  
26 and Colombia), emphasizing the capacity to transform unsustainable power structures in place of  
27 adapting to them. This application demonstrates that when agency is strongly developed, as in the  
28 case of Brazil, it is possible to transform structural conditions that restrict resilience. The inclusion  
29 and consideration of biophysical variables, management practices, agrarian structure and agency,  
30 through a participatory approach, allows for the identification of factors that inhibit or potentiate  
31 the resilience of agroecosystems.

32 **Key Words:** Resilience, Agrarian Structure, Agency, Agroecosystem, Latin America,  
33 Methodology, Resilience Evaluation

## 35 **Introduction**

36           The concept of resilience has evolved from an ecological perspective to that of complex  
37 systems analysis. Initially, it was conceived as the capacity to confront, absorb and adapt to  
38 disturbances, without changing, in order to return to a state of normality (1,2). Resilience was  
39 calculated or evaluated depending on the amount of time it would take to return to this condition  
40 (3). Analysis and discussions in the context of socio-ecological systems challenged the idea of  
41 normality, adopting an understanding of multiple equilibriums and accepting the inevitability of  
42 change (2,4). In this sense, many proposed that resilience is systems adaptation based on learning,  
43 planning and reorganization for the purpose of preserving function, structure and identity (5–7).  
44 Still, socio-ecological systems such as agroecosystems, conceptualized from a perspective of  
45 “fully integrated system[s] of people and nature” (8), do not exhibit unique identities, functions  
46 or structures (9). Agroecosystems are systems composed of physical, biological, socioeconomic  
47 and cultural subsystems that coalesce and interact within the framework of human-led agricultural

48 processes (10,11). In this sense, human intervention, expressed in different interests, values and  
49 criteria, impede the determination of a unique structure and system function (9,12).

50

51 Any system involving human interaction holds power relations that can form or influence  
52 resilience (13), since these determine which groups have access to and control of resources,  
53 assume the burden of risk, and have the possibility of participation and political decision-making  
54 (14,15). Additionally, the fluctuating nature of these systems clashes with the concept of identity,  
55 which can be understood as seeking a static and invariable condition (16).

56

57 The complementary concept of resilience offered in this article is not necessarily neutral  
58 or inherently positive, due to the lack of consensus across society on the objectives and strategies  
59 for responding to or interacting with change or disturbances (17). The resilience of  
60 agroecosystems is often power-dependent. While resilience can increase through the operation of  
61 privileged groups with greater access to resources and political participation, it can also decrease  
62 under groups with less economic power (18). Therefore, it is necessary to question, resilience for  
63 whom and for what purpose? (16,19). In this study, resilience is analyzed from the perspective of  
64 peasant and rural communities in Latin America. From the point of view of the elite, resilience is  
65 understood to be adaptation to conditions of inequality and injustice, which agrees well with  
66 neoliberal (20) and Keynesian discourse, in other words, maintaining the *status quo*. On the other  
67 hand, those with less power understand resilience to be transformation conducive of conditions  
68 of justice, which can lead to the destruction of the predominant social system (1,21–24).

69

70 The purpose of this article is to present a conceptual framework and complementary  
71 methodologies for analyzing and evaluating agroecological resilience, including factors relevant  
72 to agrarian structure and peasant community agency. This approach and methodology are applied  
73 in the comparison of two rural peasant communities in Latin America (Brazil and Colombia),  
74 emphasizing the capacity to transform unsustainable power structures instead of adapting to them.

75 The first part of the article refers to the elements that are included in calculating resilience  
76 indicators, followed by an analysis of the reach and limitations of methodologies that have been  
77 applied in rural contexts. On this basis, a new methodology is proposed for analyzing resilience.  
78 This new methodology is then applied to two locations in Brazil and Colombia. The results are  
79 presented and discussed, followed by general conclusions.

80

## 81 **Agrarian structure**

82 Whenever agroecological systems are analyzed, it becomes necessary to define the  
83 agrarian structure (AS), whose nucleus is the property of the land, based on which all other  
84 economic, social, cultural and political interactions are built. This concept combines a set of  
85 factors including the size of agroecosystems, the use and control of resources, labor conditions,  
86 relationships among social actors and between social actors and the market, infrastructural aspects  
87 and other features (25,26).

88

89 In Latin America, land has been employed as an instrument of power and social  
90 domination (27,28). High levels of land concentration (called “latifundia”) or small subsistence-  
91 oriented (called “minifundia”) farms constitute the principal motor for the backwardness and  
92 underdevelopment of the rural sector (29–32). Since AS is transcendently vital to productive  
93 power relations, peasant marginalization, territorial sovereignty, food production and access to  
94 dignified living conditions, it is surprising that it has not been included within analyses of  
95 resilience in the rural sector.

96

97 Land has historically been configured as a central means of production, whose  
98 appropriation and accumulation lay the groundwork for the construction of social power relations  
99 that determine the peasant population’s access to resources, goods and services, is a main element  
100 of their dignity and identity, and defines a great extent of their autonomy, socioeconomic

101 conditions and the development of their means of livelihood. All of these factors directly impact  
102 resilience and the capacity for transformation within rural communities (33–35).

103

## 104 **Capacity of agency**

105 The capacity of agency is understood as the empowerment of marginalized communities  
106 to engage in collective objective-oriented action aimed at transforming societal power relations  
107 (24,36,37). Agency goes beyond resisting, buffering or adapting to the hardships of capitalism. It  
108 implies that peasants can build new paths in response to a system they consider unsustainable (2),  
109 employing their own creativity, political decision-making and organizational power, to unravel  
110 their own development processes.

111

112 The role of organized collective agency has not been integrated within analyses of  
113 resilience (37). More research is needed to include the ways in which human actions shape factors  
114 such as agrarian structure. Resilience analyses have not considered power relations, assuming the  
115 existence of a society in consensus, in which it is common for certain groups to support the  
116 disasters provoked by capitalism (17,38). Nevertheless, it is relevant to include the way in which  
117 conscious choices made collectively and individually can transform conditions of inequality  
118 towards essentially new systems, this being a fundamental factor in the level of resilience acquired  
119 (9,39,40).

120

121 In this sense the proposed methodology for evaluating resilience includes the decisions  
122 peasants make about the use of resources for agricultural production (both infrastructure and  
123 subsistence), as well as the level of organization, training and political decision-making power  
124 (18,41,42). It is relevant to incorporate a differentiated analysis, not only of the economic situation  
125 of women (pay for market-oriented work, subsistence and caregiving), but also of aspects related  
126 to their empowerment, such as the levels of organization and participation in political decision-  
127 making processes (27). The participation of women is essential because they are considered to be

128 political subjects who organize and participate in decision-making regarding economic,  
129 productive, technical and political aspects, thus transforming power relations (43–47).

130

## 131 **Methodologies for evaluating resilience**

132 There are many methodological problems and few evaluation frameworks for resilience  
133 in rural contexts (39,48,49). Some methodologies are centered around ecological and productive  
134 variables, employing indicators such as landscape complexity, vegetation diversity, slope and soil  
135 conservation, energy efficiency, subsistence, water and soil conservation practices, input and  
136 technology dependence and others (10,42,50–53). These approaches address social factors only  
137 in a limited and tangential way through their general definition of resilience as the capacity of  
138 communities to adapt to extreme stressors within the productive sector.

139

140 Authors such as (4,37,39), recognize that the social aspects of resilience are weakly  
141 developed, especially with regards to empowerment. (54,55) include notions of collective  
142 community agency as important to resilience, but they do not propose measurement instruments.  
143 (56) presents eight (8) dimensions of community resilience with metrics that have not been  
144 applied in practice and that are centered on the capacity to adapt to change. (57) employ official  
145 statistics to propose an index of rural diversity, considering natural economic and social capital,  
146 under the premise that diversity increases resilience. Other authors include, in addition to  
147 ecological variables, factors such as food security, income, access to services and support  
148 networks (58). These are, however, included without numerical qualifiers or variable weights.  
149 Although (59) quantify variables such as land size, financial sources, credit and network  
150 participation, these are limited to describing the way in which these influence the adoption of  
151 agricultural technologies. (49) present 13 indicators of agroecosystem resilience which include  
152 social organization, learning, local knowledge and autonomy. Nevertheless, none of these  
153 variables consider social inequalities or access to land, determining factors for peasant  
154 livelihoods. (60,61) introduce aspects such as social inequality and land property, recognizing

155 that the socio-cultural context limits resilience. They center their attention on the capacity of  
156 farmers to respond with productive agroecological practices and define empowerment as  
157 decision-making for adaptive farm management in response to disturbances.

158

159         None of these studies includes the role of peasant agency in the transformation of  
160 structural factors that subvert power relations, bypassing the role of political organization and the  
161 building of new pathways, not only in the productive or ecological sense, but also in the social  
162 and political spheres. Productive relationships, working conditions and the use and control of  
163 resources are not evidenced, neither is it specified what social group's perspective is being  
164 analyzed in terms of resilience. All of this leaves unanswered the questions of resilience for what  
165 end? and for whom? raised by (16). Authors that consider the transformation of the status quo  
166 instead of its preservation (2,55), do not develop methodological proposals for the quantification  
167 of principal variables.

168

169         Resilience is the result of complex interactions among ecosystems, economic, social and  
170 cultural systems and cannot be analyzed through a fragmented consideration of each component  
171 in isolation from the whole (57). With this challenge in mind, a methodology is proposed for  
172 measuring resilience in rural peasant communities, through the quantification and weighing of  
173 differing attributes. In addition to aspects related to AS and peasant agencies, related factors are  
174 incorporated to the conditions and context in which productive activities are developed, including  
175 biophysical, social and health variables, as well as practices used in agricultural production. In  
176 addition, market interactions were considered, which represent the effect of variables out of the  
177 peasants' control that exercise a strong impact on income level and livelihood development.

178

179         Therefore, it is necessary to present a complementary conceptual and methodological  
180 framework that allows the identification of factors that support or inhibit resilience in Latin  
181 American peasant communities. The complex analysis of diverse factors that constitute resilience,  
182 with an emphasis on AS and the capacity of collective agency, allows for an understanding of

183 substantial aspects in need of transformation. This allows peasants to generate their own  
184 development dynamics based on their own interests and needs, favors processes of empowerment  
185 for implementing radical changes in the generation of public policy, access to resources and  
186 capital, and potential for autonomy (62–65). In this sense resilience refers to social change and  
187 challenges the *status quo* to give place to alternative scenarios (1,22,23,26).

188

## 189 **Material and Methods**

### 190 **Proposed methodology for evaluating resilience**

191 The procedure for evaluating resilience consists of three phases: (i) selection and  
192 weighting of factors, criteria and variables, (ii) scoring of variables, (iii) assigning quantified  
193 values to resilience.

#### 194 **Selection and weighting of variables**

195 A scoring matrix was built with a hierarchical structure composed of four (4) factors,  
196 eight (8) criteria and seventeen (17) variables (Fig 1). Weighting coefficients were assigned to  
197 each variable, factor and criteria, through consultation with principal actors in each community  
198 as well as expert opinion from several disciplines (anthropology, agroecology, health sciences,  
199 environmental sciences and administration). The final values were determined in a participative  
200 manner using the Delphi method (Table 1), which establishes a structured communication  
201 between experts and community members who are knowledgeable of study sites, to validate each  
202 category used in the analysis (66,67).

203

204 **Fig 1. Hierarchical structure for the evaluation of agroecosystem resilience**

205



206 **Table 1. Weighting matrix of factors, criteria and variables for the assessment of resilience**  
 207

| <b>Factor</b>                                  | <b>Criteria</b>                         | <b>Variables</b>                                                                              |
|------------------------------------------------|-----------------------------------------|-----------------------------------------------------------------------------------------------|
| <b>Capacity for agency</b><br>[50]*            | <b>Political-organizational</b><br>[35] | Pertinence and/or link to organizations, cooperatives, and educational institutions<br>[11.6] |
|                                                |                                         | Level of training and political decision-making power<br>[11.6]                               |
|                                                |                                         | Level of training and political decision-making power (women)<br>[11.6]                       |
|                                                | <b>Use of resources</b><br>[15]         | Subsistence (animal and vegetable) *<br>[7.5]                                                 |
|                                                |                                         | Infrastructure<br>[7.5]                                                                       |
| <b>Agrarian structure</b><br>[38]              | <b>Land tenure</b><br>[19]              | Property size* and/or area<br>[9.5]                                                           |
|                                                |                                         | Land ownership<br>[9.5]                                                                       |
|                                                | <b>Production relationships</b><br>[19] | Labor conditions<br>[6.3]                                                                     |
|                                                |                                         | Market relationships<br>[6.3]                                                                 |
|                                                |                                         | Level of income*<br>[6.3]                                                                     |
|                                                | <b>Conditions and context</b><br>[10]   | <b>Biophysical factors</b><br>[9.5]                                                           |
| Distance to forests and water sources<br>[1.2] |                                         |                                                                                               |
| <b>Social factors</b><br>[17]                  |                                         | Access paths<br>[2.2]                                                                         |
|                                                |                                         | Access to public services and telecommunications<br>[2.2]                                     |
| <b>Health factors</b><br>[11.5]                |                                         | Drinking water<br>[1.5]                                                                       |
|                                                |                                         | Frequency of protein consumption<br>[1.5]                                                     |
| <b>Productive practices</b><br>[2]             |                                         | <b>Soil management and biodiversity</b><br>[3]                                                |

208  
 209  
 210

[\*] Values within brackets are proposed weights

## 211 **Scoring of variables**

212 Data for differing variables were reported in different measurement units. For example,  
213 the area of land is expressed in hectares and the level of income in currency, while other  
214 characteristics are qualitative (land ownership or pertinence to organizations). Therefore, all  
215 measurement units were transformed to a standard 0 to 5 scale, where 0 represents the lowest  
216 level of resilience and 5 the greatest. This methodological strategy has been utilized and validated  
217 in several similar studies (68–76). The values were negotiated in a participatory manner,  
218 employing questionnaires, semi-structured interviews, expert opinion and literature review. Table  
219 2 presents the consolidated matrix with scoring criteria.

220

## 221 **Quantitative assessment of resilience**

222 The value of agroecosystem resilience is the result of the sum of the 17 weighted  
223 variables. Where: AgRe: Agroecosystemic Resilience; Vi: Variables; Wi: Weight.

224

$$AgR_e = \sum_{i=1}^{i=17} v_i * W_i \quad (1)$$

225

226

227 **Table 2. Resilience scoring matrix**  
228

| <b>Factor: Capacity for Agency</b> |                                                                                     |                                                                                                                                                                      |                                                                                                                                             |                                           |   |
|------------------------------------|-------------------------------------------------------------------------------------|----------------------------------------------------------------------------------------------------------------------------------------------------------------------|---------------------------------------------------------------------------------------------------------------------------------------------|-------------------------------------------|---|
| <b>Criteria</b>                    | <b>Variable</b>                                                                     | <b>Question</b>                                                                                                                                                      | <b>Answer</b>                                                                                                                               | <b>Score</b>                              |   |
| Organizational-political           | Pertinence and/or link to organizations, cooperatives, and educational institutions | Do you pertain to or are you linked to an organization that....?                                                                                                     | Favors the capacity of economic and political transformation of the community, favors the capacity for transformation of the agroecosystem. | 5                                         |   |
|                                    |                                                                                     |                                                                                                                                                                      | Favors the capacity of transformation at the agroecosystem level.                                                                           | 3                                         |   |
|                                    |                                                                                     |                                                                                                                                                                      | Generates little or no betterment of resilience conditions.                                                                                 | 1                                         |   |
|                                    | Level of training and political decision-making power                               | What is the level of participation in community decision-making processes (regarding technical, productive, economic or political decisions)?                        | High                                                                                                                                        | 5                                         |   |
|                                    |                                                                                     |                                                                                                                                                                      | Medium                                                                                                                                      | 3                                         |   |
|                                    |                                                                                     |                                                                                                                                                                      | Low                                                                                                                                         | 1                                         |   |
|                                    |                                                                                     | What is the level of participation in political training meetings aimed at learning about and demanding rights?                                                      | High                                                                                                                                        | 5                                         |   |
|                                    |                                                                                     |                                                                                                                                                                      | Medium                                                                                                                                      | 3                                         |   |
|                                    |                                                                                     |                                                                                                                                                                      | Low                                                                                                                                         | 1                                         |   |
|                                    | Level of training and political decision-making power (women)                       | What is the level of participation and political organization of the women in the neighborhood or municipality?                                                      | High                                                                                                                                        | 5                                         |   |
|                                    |                                                                                     |                                                                                                                                                                      | Medium                                                                                                                                      | 3                                         |   |
|                                    |                                                                                     |                                                                                                                                                                      | Low                                                                                                                                         | 1                                         |   |
|                                    |                                                                                     |                                                                                                                                                                      | Does not participate/ there is no organization                                                                                              | 0                                         |   |
|                                    | Use of resources                                                                    | Subsistence (animal and vegetable) *                                                                                                                                 | Number of animal species produced on the farm and used for subsistence                                                                      | Two standard deviations above the average | 5 |
|                                    |                                                                                     |                                                                                                                                                                      |                                                                                                                                             | Two standard deviations below the mean    | 0 |
| Infrastructure                     |                                                                                     | How do you rate the installations, tools for production and irrigation (if necessary) used for your main economic activity? (taking the mean of the three variables) | Very good                                                                                                                                   | 5                                         |   |
|                                    |                                                                                     |                                                                                                                                                                      | Good                                                                                                                                        | 5                                         |   |
|                                    |                                                                                     |                                                                                                                                                                      | Average                                                                                                                                     | 3                                         |   |
|                                    |                                                                                     |                                                                                                                                                                      | Poor                                                                                                                                        | 2                                         |   |
|                                    |                                                                                     |                                                                                                                                                                      | Very por                                                                                                                                    | 1                                         |   |
| Does not possess infrastructure    | 0                                                                                   |                                                                                                                                                                      |                                                                                                                                             |                                           |   |

229  
230

231 **Table 2 (Continuation). Resilience scoring matrix**  
 232

| Factor: Agrarian Structure |                                          |                                                                                                                                   |                                                                                                              |        |
|----------------------------|------------------------------------------|-----------------------------------------------------------------------------------------------------------------------------------|--------------------------------------------------------------------------------------------------------------|--------|
| Criteria                   | Variable                                 | Question                                                                                                                          | Answer                                                                                                       | Score  |
| Land Tenure                | Size of land*                            | Area of the farm in hectares                                                                                                      | If the size of the land $\geq$ UAF, then the score is 5, otherwise the score is calculated as (size/UAF) *5. | 0-5    |
|                            | Land ownership                           | Type of property                                                                                                                  | Landless                                                                                                     | 0      |
|                            |                                          |                                                                                                                                   | Sharecropper                                                                                                 | 1      |
|                            |                                          |                                                                                                                                   | Renter                                                                                                       | 2,5    |
|                            |                                          |                                                                                                                                   | Owner (with land title)                                                                                      | 5      |
|                            |                                          |                                                                                                                                   | Owner with land title from a peasant organization                                                            | 5      |
| Collective property        | 5                                        |                                                                                                                                   |                                                                                                              |        |
| Production relationships   | Labor conditions                         | Labor rights: Is there an established work schedule, rest period, vacation time and endowments? (averaging the 4 factors)         | Yes                                                                                                          | 5      |
|                            |                                          |                                                                                                                                   | No                                                                                                           | 0      |
|                            |                                          | Do you participate in any collective productive activity in your community?                                                       | Yes                                                                                                          | 5      |
|                            |                                          |                                                                                                                                   | No                                                                                                           | 0      |
|                            |                                          | Paid family labor (principal product)                                                                                             | Always                                                                                                       | 5      |
|                            |                                          |                                                                                                                                   | Occasional                                                                                                   | 3      |
|                            |                                          |                                                                                                                                   | Never                                                                                                        | 0      |
|                            |                                          | Compensation for women for jobs such as: sustenance, domestic responsibility, production for the market (averaging the 3 factors) | 3 jobs                                                                                                       | 5      |
|                            |                                          |                                                                                                                                   | 2 jobs                                                                                                       | 3      |
|                            |                                          |                                                                                                                                   | 1 job                                                                                                        | 1      |
|                            |                                          |                                                                                                                                   | Never                                                                                                        | 0      |
|                            |                                          | Market relations                                                                                                                  | What is the level of decision-making power regarding product market prices?                                  | Medium |
|                            | Low                                      |                                                                                                                                   |                                                                                                              | 1      |
| Nonexistent                | 0                                        |                                                                                                                                   |                                                                                                              |        |
| Level of income*           | What is your average level of income? ** | Under minimum wage (MW)                                                                                                           | 0                                                                                                            |        |
|                            |                                          | (Income*5) /2 MW                                                                                                                  | 3                                                                                                            |        |
|                            |                                          | Over or equal to 2 MW                                                                                                             | 5                                                                                                            |        |

233  
 234

235 **Table 2 (Continuation). Resilience scoring matrix**  
 236

| <b>Factor: conditions and context</b> |                                                  |                                                                                                      |                                      |              |
|---------------------------------------|--------------------------------------------------|------------------------------------------------------------------------------------------------------|--------------------------------------|--------------|
| <b>Criteria</b>                       | <b>Variable</b>                                  | <b>Question</b>                                                                                      | <b>Answer</b>                        | <b>Score</b> |
| <b>Biophysical factors</b>            | Soil quality                                     | How do you rate soil fertility on your farm?                                                         | High                                 | 5            |
|                                       |                                                  |                                                                                                      | Medium                               | 3            |
|                                       |                                                  |                                                                                                      | Low                                  | 1            |
|                                       |                                                  |                                                                                                      | Not fertile                          | 0            |
|                                       |                                                  | Gradient on the farm                                                                                 | None 0°                              | 5            |
|                                       |                                                  |                                                                                                      | Very low 0%-5% (0-8,5°)              | 4            |
|                                       |                                                  |                                                                                                      | Low 15%-30% (8,5°-16,7°)             | 3            |
|                                       |                                                  |                                                                                                      | Medium 30%-50% (16,7°-26-6°)         | 2            |
|                                       |                                                  |                                                                                                      | High 50%-100% (26,6°-45°)            | 1            |
|                                       | Distance to forests and water sources            | Distance of the agroecosystem to natural forest fragments (using area geometry and spatial analysis) | High: between 0 and 300 meters.      | 5            |
|                                       |                                                  |                                                                                                      | Medium: between 300 and 500 meters.  | 3            |
|                                       |                                                  |                                                                                                      | Low: between 500 and 1.000 meters.   | 0-1          |
|                                       |                                                  | Distance of the agroecosystem to bodies of water (using area geometry and spatial analysis)          | High: between 0 and 50 meters.       | 5            |
| Medium: between 50 and 100 meters.    | 3                                                |                                                                                                      |                                      |              |
| Low: between 100 and 300 meters.      | 0-1                                              |                                                                                                      |                                      |              |
| <b>Social factors</b>                 | Access paths                                     | Principal access path from the farm to a point of sale for the main product                          | Paved road                           | 5            |
|                                       |                                                  |                                                                                                      | Combined paved road and unpaved road | 4            |
|                                       |                                                  |                                                                                                      | Unpaved road                         | 3            |
|                                       |                                                  |                                                                                                      | Trail                                | 2            |
|                                       |                                                  |                                                                                                      | Bridle path                          | 1            |
|                                       |                                                  |                                                                                                      | No access paths                      | 0            |
|                                       | Access to public services and telecommunications | Public services (drinking water, light, household gas)                                               | All 3                                | 5            |
|                                       |                                                  |                                                                                                      | 2 of 3                               | 3,3          |
|                                       |                                                  |                                                                                                      | 1 of 3                               | 1,7          |
|                                       |                                                  |                                                                                                      | None                                 | 0            |
|                                       |                                                  | Communications (newspaper, telephone (cellphone signal), internet, radio, tv)                        | All 5                                | 5            |
|                                       |                                                  |                                                                                                      | 4 of 5                               | 4            |
|                                       |                                                  |                                                                                                      | 3 of 5                               | 3            |
|                                       |                                                  |                                                                                                      | 2 of 5                               | 2            |
|                                       |                                                  |                                                                                                      | 1 of 5                               | 1            |
| None                                  | 0                                                |                                                                                                      |                                      |              |

237

238 **Table 2 (Continuation). Resilience scoring matrix**  
 239

| <b>Factor: conditions and context</b>   |                                                                                        |                                                                                                                         |                          |              |
|-----------------------------------------|----------------------------------------------------------------------------------------|-------------------------------------------------------------------------------------------------------------------------|--------------------------|--------------|
| <b>Variable</b>                         |                                                                                        | <b>Question</b>                                                                                                         | <b>Answer</b>            | <b>Score</b> |
| <b>Health factors</b>                   | Drinking water                                                                         | Do you have access to clean drinking water?                                                                             | No                       | 0            |
|                                         |                                                                                        |                                                                                                                         | Si                       | 5            |
|                                         | Frequency of protein consumption                                                       | Number of protein products consumed daily by every member of the family (eggs, legumes and meats)                       | (# times a week) /21) *5 | 0-5          |
| <b>Factor: productive practices</b>     |                                                                                        |                                                                                                                         |                          |              |
| <b>Criteria</b>                         | <b>Variable</b>                                                                        | <b>Question</b>                                                                                                         | <b>Answer</b>            | <b>Score</b> |
| <b>Soil management and biodiversity</b> | Soil management and biodiversity                                                       | Do you use polyculture or accompanying diversity for pest control, increased soil fertility or subsistence agriculture? | No                       | 0            |
|                                         |                                                                                        |                                                                                                                         | Yes                      | 5            |
|                                         | How often do you use herbicides, pesticides and synthetic fertilizers?                 | High                                                                                                                    | 0                        |              |
|                                         |                                                                                        | Medium                                                                                                                  | 1                        |              |
|                                         |                                                                                        | Low                                                                                                                     | 3                        |              |
|                                         |                                                                                        | None                                                                                                                    | 5                        |              |
|                                         | How would you rate your level of traditional knowledge and/or training in agroecology? | High                                                                                                                    | 5                        |              |
|                                         |                                                                                        | Medium                                                                                                                  | 3                        |              |
|                                         |                                                                                        | Low                                                                                                                     | 2                        |              |
|                                         |                                                                                        | None                                                                                                                    | 0                        |              |

240

241 *\*Data were normalized, and atypical values were eliminated, then the mean and standard deviation were*  
 242 *calculated.*

243 *\*\*Minimum wage salary for Colombia is: 264,67USD, and for Brazil: 264,58 USD*

244

## 245 **Application**

246 The proposed methodological model was applied to two localities in Colombia and Brazil:  
 247 the municipality of Marulanda within the state of Caldas in Colombia (Lat 5° 17' 3" North, Long  
 248 74° 15' 48" West), and the municipality of Varzelândia within the North of Minas Gerais in Brazil  
 249 (Lat 15° 42' 5" South; Long 44° 1' 39" West) (Fig 2). These sites were chosen because they share  
 250 certain aspects such as the bimodal structure of land ownership, where "latifundia" and  
 251 fragmented smallholder farms are predominant, with self-sustainable agricultural family units  
 252 (Family Agricultural Units or UAF) and inspection units (Fiscal Modules) under the  
 253 recommended area (18,83 ha) by the Colombian Institute for Rural Development (Colombian  
 254 Institute for Rural Development or INCODER) in Colombia and the recommended area (50 ha)

255 by the National Institute for Colonization and Agrarian Reform (INCRA) in Brazil. This land  
256 concentration generates inequality in power relations, that should be considered when measuring  
257 resilience in rural communities. On the other hand, the marked differences between these two  
258 communities to transform their socioecological systems allows a comparison of their level of  
259 agency and how this influences the final evaluations of resilience in each case.

260

261 **Fig 2. Localization of study areas**

262

## 263 **Data collection**

264 Qualitative and quantitative methods were combined for the analysis of biophysical and  
265 sociocultural conditions that come into play in the resilience of both communities. The following  
266 data collection instruments were used:

267

268 *Participatory workshops:* 5 group workshops were conducted in the municipality of  
269 Marulanda and 8 in the municipality of Varzelândia, including main actors in each municipality.

270 In the workshops variables and resilience scoring criteria were defined in a participatory manner.

271 *Surveys:* surveys were conducted in each of the studied agroecosystems (N=34), employing a  
272 questionnaire composed principally of close-ended multiple-choice questions and forecasting  
273 (77).

274 *Semi-structured interviews:* 23 semi-structured interviews were conducted in Marulanda  
275 and 31 in Varzelândia, with town officials, peasants, leaders of political and local organizations,  
276 which permitted a greater degree of flexibility and depth in obtaining information (78). The  
277 interviews were conducted in different workspaces of planting and harvesting, local commerce  
278 and the home.

279

280

## 281 **Results, Discussion, Conclusions**

282

283 In consensus, the communities of both municipalities and experts assigned a coefficient  
284 of 0.5-1.0 to the capacity for agency, since it represents an indispensable factor for the  
285 construction of resilience. Agency is directly related to the ability of the community to self-  
286 organize and strengthen autonomy and participation in decision-making spaces, generating  
287 transformations, adjustments and modifications at different scales in each social, economic,  
288 political, ecological, and livelihood context.

289

290 The factor that was given the second most important weight was agrarian structure (0.37-  
291 1.0), which consists of the size of the agroecosystem, the type of ownership and other factors  
292 derived from the first two, such as market relations, working conditions and income level. The  
293 remaining criteria, "conditions and context" and "productive practices", were given lesser  
294 relevance in the construction of resilience, since they can be modified by human agency.  
295 Therefore, they were assigned a weight of (0.1-1.0) and (0.03-1.0) respectively.

296

297 Fig 3 shows that the resilience of agroecosystems in the municipality of Marulanda,  
298 Colombia is lower than that of agroecosystems in the municipality of Varzelândia, Brazil (71%).  
299 The municipality of Marulanda had low scores ( $< 2.5$ ), while the municipality of Varzelândia had  
300 average scores (2.5-3.5) for 68% of agroecosystems and high scores ( $> 3.5$ ), for the remaining  
301 18%.

302

### 303 **Fig 3. Total values of resilience in Brazil and Colombia**

304

305 The analysis of variance resulted in a confidence level of 95%, which signifies that the  
306 resilience of the municipality of Varzelândia is significantly greater than the resilience of the  
307 municipality of Marulanda, and that this result is not due to chance (79). Significant variables



308 include: the degree of membership in organizations, the degree of training and political decision-  
309 making power, political participation of women, infrastructure, land ownership and working  
310 conditions.

311

312         The inclusion of AS and agency criteria allows for a closer representation of reality and  
313 explains why some variables held higher ratings than others. In the case of Varzelandia, the  
314 peasants' capacity for agency modified certain aspects related to agrarian structure, for example,  
315 through the occupation and ownership of fertile lands (average score of 4.6) and flat lands  
316 (average score of 4.3), which were previously owned by powerful landowners (77% of the  
317 territory was held by 8 landowners). This factor also allowed for a transformation of productive  
318 relationships by developing a collective production area where women, youth and elderly are  
319 remunerated through hourly pay (average score of 2.2 versus 0.4 for the municipality of  
320 Marulanda). Prior to developing the collective area, the peasants in Varzelandia worked under  
321 local landowners and were often exploited. This implies that beyond adapting, they managed to  
322 transform structural conditions, enhancing their resilience. In addition, the capacity of  
323 organization and community-level management created enough pressure for the Mayor and city  
324 council to provide materials and machinery for the construction of a deep well and bridge over  
325 the river Arapuim, thus improving the infrastructure score (3.6 versus 2.7 for the municipality of  
326 Marulanda). In addition, the community committed itself to facilitating labor for these two  
327 projects, carrying out the process collectively. The installation of the deep well guarantees  
328 irrigation for the collective production area, and the construction of the bridge improves  
329 connectivity, transport and quality of life.

330

331         On the contrary, in the municipality of Marulanda, the community adapted to social  
332 conditions without achieving transformations that would improve peasant livelihoods. Therefore,  
333 in general, the score for pertaining to or connecting with organizations or cooperatives (average  
334 2.7), as well as the degree of training and family-level political decision-making power (average  
335 1.0) and especially women's decision-making power (average 1.0), was low in all cases. In this

336 municipality, the peasant smallholder has restricted access to resources, goods and services, and  
337 productive activities use unpaid family labor intensively, in order to increase their precarious  
338 income and improve living conditions. It is evident in this case that simple commodity production,  
339 developed individually, limits the accumulation of capital (80,81).

340

341 Socio-economic conditions influence community agency. In the municipality of  
342 Varzelandia, the deep history of land struggles and strong peasant organization has allowed  
343 farmers to solve problems related to land tenure and production relationships. However, in the  
344 municipality of Marulanda, the historical absence of land struggles has maintained a limited  
345 division of land parcels through informal agreements, perpetuating the dominant economic  
346 position of powerful landowners (80).

347

348 Factors at all scales affect the resilience of the agroecosystem. For example, peasants have  
349 no impact on the prevailing factors governing market relations, and therefore, market relations  
350 are scored as zero in both municipalities, regardless of the capacity for agency. The fixing of  
351 product prices is determined by various dynamics of the capitalist market and by local economic  
352 powers (82).

353

354 Dependence on the country's agricultural policies or international fluctuation of prices  
355 negatively affect resilience (2,83). Therefore, it is necessary to include power relations derived  
356 from global scales, which prevent peasants from reaching full autonomy in decision making or  
357 real participation in processes of political definition (8,16,19,84).

358

359 Weighing criteria and landscape indicators give a closer sense of the reality of the case  
360 studies and allows a greater understanding of the factors that most strongly affect resilience.  
361 Without weighing variables, certain factors such as soil fertility, slope or access to public services  
362 would be considered on an equal level as criteria related to community agency or agrarian  
363 structure. The proposed methodology includes aspects that are normally invisible, revealing

364 power relations and transformation processes that alter structures and predominant social  
365 dynamics within communities (21,85).

366

367 Fig 4 shows the results of calculating resilience without considering AS or agency,  
368 utilizing criteria associated with productive practices and biophysical conditions in comparison  
369 with the weighted average using all the proposed variables. The results of the municipality of  
370 Marulanda are higher in scenario Y than scenario X, with a variance between 18 and 93%. On the  
371 contrary, the municipality of Varzelandia showed lower results for scenario Y, lowering the mean  
372 values of resilience, with soil fertility and slope being the variables with the greatest weight.

373

374 **Fig 4. Total resilience in Brazil and Colombia comparing all proposed variables (scenario**  
375 **X) vs. only biophysical factors and management practices (scenario Y)**

376

377 When only biophysical factors and agricultural practices are considered, there is only a  
378 difference of 0.2% between the two localities (a score of 2.7 for Colombia vs. 2.5 for Brazil). On  
379 the contrary, when all variables are considered, the difference between average values is almost  
380 a whole point (1.0), with Brazil showing the greater average score.

381

382 The values with the highest scores in the municipality of Marulanda were distance to  
383 forests and water sources (average 4.4 vs. 1.0 in Varzelandia) as well as the presence of rivers  
384 and water sources within ecosystems (1.5 vs. 0.1). In this sense it would be difficult to adopt  
385 strategies to increase resilience, since the criteria are already a part of the environment in which  
386 the agroecosystems are immersed and therefore difficult to modify.

387

388 Including all variables allows for an evaluation and analysis that can be used as an  
389 instrument to support decision-making in the short, medium and long term, as well as a tool for  
390 planning and determining effective solutions in the social sphere (86,87). The transformations  
391 peasants require to increase their resilience involve power structures, markets, institutions and

392 predominate societal values (83,84). Beyond the biophysical factors and productive practices,  
393 rural populations are immersed in social contexts, within which they are challenged by political  
394 and economic differences, not only at the local scale but also at the global scale (16,18,88).

395

## 396 **Conclusions**

397 The findings reveal that the level of political organization and participation in decision-  
398 making processes regarding economic, productive, technical and political components of  
399 agroecosystems, as well as the acknowledgement of rights and the determination to organize to  
400 demand them, are factors that favor the transformation of structural aspects in the municipality of  
401 Varzelândia. Therefore, the capacity of agency received a greater weight in the overall  
402 quantification of resilience.

403

404 Our attention should not only be focused on the local population's capacities to transform  
405 their conditions while understating the importance of the political, social and economic context  
406 that conditions these capacities. Conducts, values and the distribution of risks and benefits are  
407 formed by structures and social norms. Both factors are decisive in analyzing resilience.

408

409 The peasants of Marulanda have adapted to many circumstances without achieving  
410 transformation, while the peasants of Varzelândia have built effective social networks,  
411 strengthening their capacity for agency and transformation before conditions of social inequality.

412

413 The proposed methodology can be replicated in other contexts, including other  
414 indicators and weights that represent what is valued by a society, along with its knowledge and  
415 perceptions.

416

417 The proposed resilience is directed towards the formulation of strategies and policies  
418 aimed at inducing radical change at the local and regional level. In this way it cannot be

419 constrained by access to technology or biophysical resources that favor adaptation and a limited  
420 sense of wellbeing for peasant communities.

421

## 422 **Funding**

423

424 This paper gratefully acknowledges the support and funding from Interdisciplinary Center  
425 for Development Studies, Universidad de los Andes (Bogotá, Colombia) and the project:  
426 “Environmental Impact Assessment in Colombia. Critical analysis and Improvement”, Code  
427 Hermes: 13129, Universidad Nacional de Colombia, sede Bogotá.

428

## 429 **References**

- 430 1. Martin-Breen P, Anderies J. Resilience: a literature review [Internet]. Newark, NJ:  
431 Institute of Development Studies (IDS), the Resource Alliance and the Rockefeller  
432 Foundation; 2011. Available from:  
433 [https://opendocs.ids.ac.uk/opendocs/bitstream/handle/123456789/3692/Bellagio-](https://opendocs.ids.ac.uk/opendocs/bitstream/handle/123456789/3692/Bellagio-Rockefeller_bp.pdf?sequence=1&isAllowed=y)  
434 [Rockefeller\\_bp.pdf?sequence=1&isAllowed=y](https://opendocs.ids.ac.uk/opendocs/bitstream/handle/123456789/3692/Bellagio-Rockefeller_bp.pdf?sequence=1&isAllowed=y)
- 435 2. Walker B, Holling C, Carpenter S, Kizing A. Resilience, adaptability and  
436 transformability in social-ecological systems. *Ecol Soc.* 2004;9(2).
- 437 3. Holling C. Engineering within ecological constraints. Washington, D.C.: National  
438 Academies Press; 1996.
- 439 4. Berkes F, Folke C. Linking social and ecological systems: management practices and  
440 social mechanisms for building resilience. Cambridge UK: Cambridge University Press;  
441 1998. 437 p.
- 442 5. Joseph J. Resilience as embedded neoliberalism: a governmentality approach.  
443 *Resilience.* 2013;1(1):38–52.
- 444 6. Carpenter S, Walker B, Anderies J, Abel N. From metaphor to measurement: resilience  
445 of what to what? *Ecosystems.* 2001;4(8):765–81.
- 446 7. Manyena SB. The concept of resilience revisited. *Disasters.* 2006 Dec;30(4):434–50.

- 447 8. Cumming G. Spatial resilience in networks. In: *Spatial Resilience in Social-Ecological*  
448 *Systems*. Cape Town: Springer; 2011. p. 121–42.
- 449 9. Davies J, Robinson LW, Ericksen PJ. Development Process Resilience and Sustainable  
450 Development: Insights from the Drylands of Eastern Africa. *Soc Nat Resour.*  
451 2015;28(3):328–43.
- 452 10. León T, Toro J, Martínez F, Cleves A. The main agroecological structure (MAS) of the  
453 agroecosystems: concept, methodology and applications. *Sustainability.*  
454 2018;10(3131):1–21.
- 455 11. Faden R, Beauchamp T, King N. *A history and theory of informed consent*. Oxford:  
456 Oxford University Press; 1986. 392 p.
- 457 12. Ute K, Rhys K. Resilience, solidarity, agency – grounded reflections on challenges and  
458 synergies. *Resilience.* 2017;5(1):10–28.
- 459 13. Pratt C, Kaly U, Mitchell J. *Manual: how to use the environmental vulnerability index*  
460 *(EVI)*. SOPAC technical report 383 [Internet]. 2004. Available from:  
461 [http://islands.unep.ch/EVI\\_Manual.pdf](http://islands.unep.ch/EVI_Manual.pdf)
- 462 14. Granderson A. Making sense of climate change risks and responses at the community  
463 level: A cultural-political lens. *Clim Risk Manag.* 2014;3:55–64.
- 464 15. Ensor J, Park S, Hoddy E, Ratner B. A rights-based perspective on adaptive capacity.  
465 *Glob Environ Chang.* 2015;31:38–49.
- 466 16. Friend R, Moench M. What is the purpose of urban climate resilience? Implications for  
467 addressing poverty and vulnerability. *Urban Clim.* 2013;6:98–113.
- 468 17. Hatt K. Social Attractors: A Proposal to Enhance “Resilience Thinking” about the  
469 Social. *Soc Nat Resour.* 2013;26(1):30–43.
- 470 18. Béné C, Godfrey R, Newsham A, Davies M. Resilience: new utopia or new tyranny?  
471 reflection about the potentials and limits of the concept of resilience in relation to  
472 vulnerability reduction programmes [Internet]. Brighton; 2012. (IDS Working Paper).  
473 Report No.: 405. Available from:  
474 <https://onlinelibrary.wiley.com/doi/epdf/10.1111/j.2040-0209.2012.00405.x>

- 475 19. Lebel L, Anderies J, Campbell B, Folke C, Hatfield-Dodds S, Hughes T, et al.  
476 “Governance and the Capacity to Manage Resilience in Regional Social-Ec” by L.  
477 Lebel, J. M. Anderies et al. *Ecol Soc* [Internet]. 2006;11(1):19. Available from:  
478 <http://www.ecologyandsociety.org/vol11/iss1/art19/>
- 479 20. Bohle HG, Etzold B, Keck M. Resilience as agency. *Int Hum Dimens Program Updat*.  
480 2009;2:8–13.
- 481 21. Sinclair K, Rawluk A, Kumar S, Curtis A. Ways forward for resilience thinking: lessons  
482 from the field for those exploring social-ecological systems in agriculture and natural  
483 resource management. *Ecol Soc*. 2017 Nov;22(4):art21.
- 484 22. Hahn T, Nykvist B. Are adaptations self-organized, autonomous, and harmonious?  
485 Assessing the social–ecological resilience literature. *Ecol Soc*. 2017;22(1):12.
- 486 23. Matarrita D, Trejos B, Qin H, Joo D, Debner S. Conceptualizing community resilience:  
487 revisiting conceptual distinctions. *Community Dev*. 2017;48(1):105–23.
- 488 24. Pelling M, Manuel-Navarrete D. From resilience to transformation: the adaptive cycle in  
489 two mexican urban centers. *Ecol Soc* [Internet]. 2011;16(2):11. Available from:  
490 [https://www.jstor.org/stable/pdf/26268885.pdf?refreqid=excelsior%3A2407e6126fa5e7b](https://www.jstor.org/stable/pdf/26268885.pdf?refreqid=excelsior%3A2407e6126fa5e7b66d9fea8cc271b1ec)  
491 [66d9fea8cc271b1ec](https://www.jstor.org/stable/pdf/26268885.pdf?refreqid=excelsior%3A2407e6126fa5e7b66d9fea8cc271b1ec)
- 492 25. Arroyo M. On the Concept of Agrarian Structure (Sobre el Concepto de Estructura  
493 Agraria). *Rev Geográfica* [Internet]. 1990;112:141–52. Available from:  
494 <https://www.jstor.org/stable/40992622>
- 495 26. Altieri M, Toledo V. The agroecological revolution in Latin America: Rescuing nature,  
496 ensuring food sovereignty and empowering peasants. *J Peasant Stud*. 2011;38(3):587–  
497 612.
- 498 27. OXFAM. *Unearthed: land, power and inequality in Latin America* [Internet]. Oxford;  
499 2016. Available from: [www.oxfam.org](http://www.oxfam.org)
- 500 28. Gómez S. The land market in Latin America and the Caribbean: concentration and  
501 foreignization [Internet]. Soto F, Gómez S, editors. Santiago: Food and Agriculture  
502 Organization of the United Nations-FAO; 2014. 128 p. Available from:

- 503 <http://www.fao.org/3/a-i4172e.pdf>
- 504 29. Barrientos-fuentes J, Torrico-albino J. Socio-economic perspectives of family farming in  
505 South America : cases of Bolivia, Colombia and Peru. *Agron Colomb*. 2014;32(2):266–  
506 75.
- 507 30. Keswell M, Carter M. Poverty and land redistribution. *J Dev Econ* [Internet].  
508 2014;110:250–61. Available from: <http://dx.doi.org/10.1016/j.jdeveco.2013.10.003>
- 509 31. Oyvat C. Agrarian structures, urbanization, and inequality. *World Dev* [Internet].  
510 2016;83:207–30. Available from: <http://dx.doi.org/10.1016/j.worlddev.2016.01.019>
- 511 32. Barraclough S, Domike A. Agrarian structure in seven latin american countries. *Land*  
512 *Econ*. 1966;42(4):391–424.
- 513 33. Adger WN. Social and ecological resilience: Are they related? *Prog Hum Geogr*.  
514 2000;24(3):347–64.
- 515 34. Berkes F. Understanding uncertainty and reducing vulnerability: lessons from resilience  
516 thinking. *Nat Hazards*. 2007;41(2):283–95.
- 517 35. Mayunga JS. Understanding and applying the concept of community disaster resilience:  
518 a capital-based approach. In: *Summer Academy for Social Vulnerability and Resilience*  
519 *Building* [Internet]. Munich, Germany; 2007. p. 1–16. Available from: [https://www.u-](https://www.u-cursos.cl/usuario/3b514b53bcb4025aaf9a6781047e4a66/mi_blog/r/11._Joseph_S._Mayunga.pdf)  
520 [cursos.cl/usuario/3b514b53bcb4025aaf9a6781047e4a66/mi\\_blog/r/11.\\_Joseph\\_S.\\_Mayu](https://www.u-cursos.cl/usuario/3b514b53bcb4025aaf9a6781047e4a66/mi_blog/r/11._Joseph_S._Mayunga.pdf)  
521 [nga.pdf](https://www.u-cursos.cl/usuario/3b514b53bcb4025aaf9a6781047e4a66/mi_blog/r/11._Joseph_S._Mayunga.pdf)
- 522 36. Béné C, Newsham A, Davies M, Ulrichs M, Godfrey-Wood R. Review article:  
523 resilience, poverty and development. *J Int Dev*. 2014;26(5):598–623.
- 524 37. Davidson D. The Applicability of the Concept of Resilience to Social Systems: Some  
525 Sources of Optimism and Nagging Doubts. *Soc Nat Resour*. 2010;23(12):1135–49.
- 526 38. Kolers A. Resilience as a political ideal. *Ethics, Policy Environ*. 2016 Jan;19(1):91–107.
- 527 39. Berkes F, Ross H. Community resilience: toward an integrated approach. *Soc Nat*  
528 *Resour*. 2013;26(1):5–20.
- 529 40. Gunderson L, Carpenter S, Folke C, Olsson P, Peterson G. Insight, part of a special  
530 feature on exploring resilience in social-ecological systems water RATs (resilience,



- 531 adaptability, and transformability) in lake and wetland social-ecological systems. *Ecol*  
532 *Soc.* 2006;11(1):16.
- 533 41. Norberg J, Cumming G. Complexity theory for a sustainable future [Internet]. New  
534 York: Columbia University Press; 2008. 315 p. Available from:  
535 [https://cup.columbia.edu/book/complexity-theory-for-a-sustainable-](https://cup.columbia.edu/book/complexity-theory-for-a-sustainable-future/9780231134613)  
536 [future/9780231134613](https://cup.columbia.edu/book/complexity-theory-for-a-sustainable-future/9780231134613)
- 537 42. Altieri M, Funes-Monzote F, Petersen P. Agroecologically efficient agricultural systems  
538 for smallholder farmers: Contributions to food sovereignty. *Agron Sustain Dev.*  
539 2012;32(1):1–13.
- 540 43. Adger N. Social capital, collective action, and adaptation to climate change. *Econ Geogr.*  
541 2003;79(4):387–404.
- 542 44. Coulthard S. Can we be both resilient and well, and what choices do people have?  
543 incorporating agency into the resilience debate from a fisheries perspective. *Ecol Soc.*  
544 2012;17(1):4.
- 545 45. Long N, Van der Ploeg J. Heterogeneity, actor and structure: towards a reconstitution of  
546 the concept of structure. In: *Rethinking Social Development Theory, research and*  
547 *practice.* Harlow: Longman; 1994. p. 62–89.
- 548 46. Osbahr H. Building resilience: adaptation mechanisms and mainstreaming for the poor  
549 [Internet]. Oxford; 2007. Available from:  
550 [http://hdr.undp.org/sites/default/files/osbahr\\_henny.pdf](http://hdr.undp.org/sites/default/files/osbahr_henny.pdf)
- 551 47. Ostrom E, Burger J, Field C, Norgaard R, Policansky D. Revisiting the commons: local  
552 lessons, global challenges. *Science* (80- ). 1999;284(5412):278–82.
- 553 48. Darnhofer I, Fairweather J, Moller H. Assessing a farm’s sustainability: Insights from  
554 resilience thinking. *Int J Agric Sustain.* 2010;8(3):186–98.
- 555 49. Cabel J, Oelofse M. An indicator framework for assessing agroecosystem resilience.  
556 *Ecol Soc.* 2012;17(1):1–18.
- 557 50. Altieri M. Agroecology: the science of natural resource management for poor farmers in  
558 marginal environments. *Agric Ecosyst Environ.* 2002;93:1–24.

- 559 51. Casimiro L, Casimiro J. How to make prosperous and sustainable family farming in  
560 Cuba a reality. *Elem Sci Anthr.* 2018;6:1–15.
- 561 52. Koochafkan P, Altieri M, Holt E. Green agriculture: foundations for biodiverse, resilient  
562 and productive agricultural systems, *International Journal of Agricultural Sustainability*.  
563 *Int J Agric Sustain.* 2011;10(1):61–75.
- 564 53. Sarandón S, Flores C, Gargoloff A, Blandi M. Analysis and evaluation of  
565 agroecosystems: construction and application of indicators. In: Sarandón S, Flores C,  
566 editors. *Agroecology: theoretical bases for the design and management of sustainable*  
567 *agroecosystems* [Internet]. La Plata, Argentina: Editorial de la Universidad de La Plata;  
568 2014. p. 375–410. Available from: <http://sedici.unlp.edu.ar/handle/10915/37280>
- 569 54. Brown K, Westaway E. agency, capacity, and resilience to environmental change:  
570 lessons from human development, well-being, and disasters. *Annu Rev Environ Resour.*  
571 2011;36(1):321–42.
- 572 55. Wilson G. *Community resilience and environmental transitions*. 1st ed. London:  
573 Routledge; 2012. 240 p.
- 574 56. Magis K. Community resilience: an indicator of social sustainability. *Soc Nat Resour.*  
575 2010;23(5):401–16.
- 576 57. Quaranta G, Salvia R. An index to measure rural diversity in the light of rural resilience  
577 and rural development debate. *Eur Countrys.* 2014;6(2):1–18.
- 578 58. Tambo J, Abdoulaye T. Climate change and agricultural technology adoption: the case  
579 of drought tolerant maize in rural Nigeria. *Mitig Adapt Strateg Glob Chang.*  
580 2012;17(3):277–92.
- 581 59. Peredo S, Vela M, Jiménez A. Determination of resilience/vulnerability levels of urban  
582 agroecology initiative in the south west of Andalusia. *IDESIA* [Internet]. 2016;34(2):5–  
583 13. Available from: <https://scielo.conicyt.cl/pdf/idesia/v34n2/aop0316.pdf>
- 584 60. Gazzano I, Altieri M, Achkar M, Burgueño J. Holistic risk index: a case study of cattle  
585 producers in the protected area of farrapos estuaries-Uruguay. *Agroecol Sustain Food*  
586 *Syst.* 2015;39(2):209–23.

- 587 61. Panpakdee C, Limnirankul B. Indicators for assessing social-ecological resilience: A  
588 case study of organic rice production in northern Thailand. *Kasetsart J Soc Sci*.  
589 2018;39(3):414–21.
- 590 62. Bristow G, Healy A. Regional resilience: an agency perspective. *Reg Stud*.  
591 2014;48(5):923–35.
- 592 63. Brown K. Global environmental change i: a social turn for resilience? *Prog Hum Geogr*.  
593 2014;38(1):107–17.
- 594 64. Korzilius H. Researching resilience: some methodological is ssues. *Syst Res Behav Sci*.  
595 2017;34(4):463–8.
- 596 65. Mier y Terán Giménez Cacho M, Giraldo O, Aldasoro M, Morales H, Ferguson B,  
597 Rosset P, et al. Bringing agroecology to scale: key drivers and emblematic cases.  
598 *Agroecol Sustain Food Syst* [Internet]. 2018;42(6):637–65. Available from:  
599 <https://doi.org/10.1080/21683565.2018.1443313>
- 600 66. Skeiker K, Ghani B. Advanced software tool for the creation of a typical meteorological  
601 year. *Energy Convers Manag*. 2008;49(10):2581–7.
- 602 67. Lee Y, Altschuld J, Hung H. Practices and challenges in educational program evaluation  
603 in the Asia-Pacific region : Results of a Delphi study. *Eval Program Plann*. 2008;31:368–  
604 75.
- 605 68. Arrieta G, Requena I, Toro J, Zamorano M. Adaptation of EVIAVE methodology for  
606 monitoring and follow-up when evaluating the environmental impact of landfills.  
607 *Environ Impact Assess Rev*. 2016;56:168–79.
- 608 69. Dee N, Baker J, Drobny N, Duke K, Whitman I, Fahringer D. An environmental  
609 evaluation system for water resource planning. *Water Resour Res*. 1973;9(3):523–35.
- 610 70. Glasson J, Therivel R, Chadwik A. Introduction to environmental impact assessment. 4th  
611 ed. *Built Environment, Environment and Sustainability*. London: Routledge; 2012. 416  
612 p.
- 613 71. Lohani B, Evans J, Everitt R, Ludwig H, Carpenter R, Tu S-L. Environmental impact  
614 assessment for developing countries in Asia [Internet]. Vol. 1 Overview, Asian

- 615 Development Bank. Metro Manila: Asian Development Bank; 1997. 356 p. Available  
616 from: <https://www.adb.org/publications/environmental-impact-assessment-developing->  
617 [countries-asia](https://www.adb.org/publications/environmental-impact-assessment-developing-countries-asia)
- 618 72. Ortolano L, Shepherd A. Environmental impact assessment: challenges and  
619 opportunities. *Impact Assess*. 1995;13(1):3–30.
- 620 73. Phillips J. The geocybernetic assessment matrix (GAM). A new assessment tool for  
621 evaluating the level and nature of sustainability or unsustainability. *Environ Impact*  
622 *Assess Rev*. 2016;56:88–101.
- 623 74. Solomon R, Colbert B, Hansen W, Richardson S, Center L, Vlachos E. Water resources  
624 assessment methodology (WARM). *Impact assessment and alternative evaluation*  
625 [Internet]. 1977. Available from: <https://apps.dtic.mil/dtic/tr/fulltext/u2/a036677.pdf>
- 626 75. Martínez F, Toro J, León C. A complex network approach to environmental impact  
627 assessment. *Impact Assess Proj Apprais*. 2018;1–14.
- 628 76. Toro J, Requena I, Duarte O, Zamorano M. A qualitative method proposal to improve  
629 environmental impact assessment. *Environ Impact Assess Rev*. 2013 Nov;43:9–20.
- 630 77. Benedetti R, Bee M, Espa G, Piersimoni F. *Agricultural Survey Methods*. New York:  
631 John Wiley and Sons; 2010. 395 p.
- 632 78. Galletta A. *Mastering the semi-structured interview and beyond: from research design to*  
633 *analysis and publication*. New York: New York University Press; 2012. 284 p.
- 634 79. Fisher R. *Statistical methods for research workers*. Edinburgh: Oliver & Boyd; 1925.
- 635 80. Murillo-Lozano M. Colombian coffee culture in the XXI century: a revision to resent  
636 literature. *Gestión y Región* [Internet]. 2010;(9):127–52. Available from:  
637 <http://biblioteca.ucp.edu.co/ojs/index.php/gestionyregion/article/view/942/892>
- 638 81. Marx K. *Der achtzehnt brumaire des Louis Napoleon* [Internet]. Vol. 1, Die revolution.  
639 New York: Joseph Weydemeyer; 1952. Available from:  
640 <https://www.marxists.org/archive/marx/works/1852/18th-brumaire/index.htm>
- 641 82. Lanka S, Khadaroo I, Böhm S. Agroecology accounting: biodiversity and sustainable  
642 livelihoods from the margins. *Accounting, Audit Account J*. 2017;30(7):1592–613.

- 643 83. Darnhofer I. Resilience and why it matters for farm management. *Eur Rev Agric Econ.*  
644 2014;41(3):461–84.
- 645 84. Pahl-Wostl C. A conceptual framework for analysing adaptive capacity and multi-level  
646 learning processes in resource governance regimes. *Glob Environ Chang.*  
647 2009;19(3):354–65.
- 648 85. Walker B, Salt D. Resilience thinking: sustaining ecosystems and people in a changing  
649 world. Washington, USA: Island Press; 2006.
- 650 86. Belacel N. Multicriteria assignment method PROAFTN: Methodology and medical  
651 application. *Eur J Oper Res.* 2000;125(1):175–83.
- 652 87. Hajkowicz S, Collins K. A review of multiple criteria analysis for water resource  
653 planning and management. *Water Resour Manag.* 2006;21(9):1553–1566.
- 654 88. Koppel J. A multiple knowledge approach for adaptation to environmental change:  
655 lessons learned from coastal Louisiana’s tribal communities. *J Polit Ecol.* 2014;21(1):61.  
656

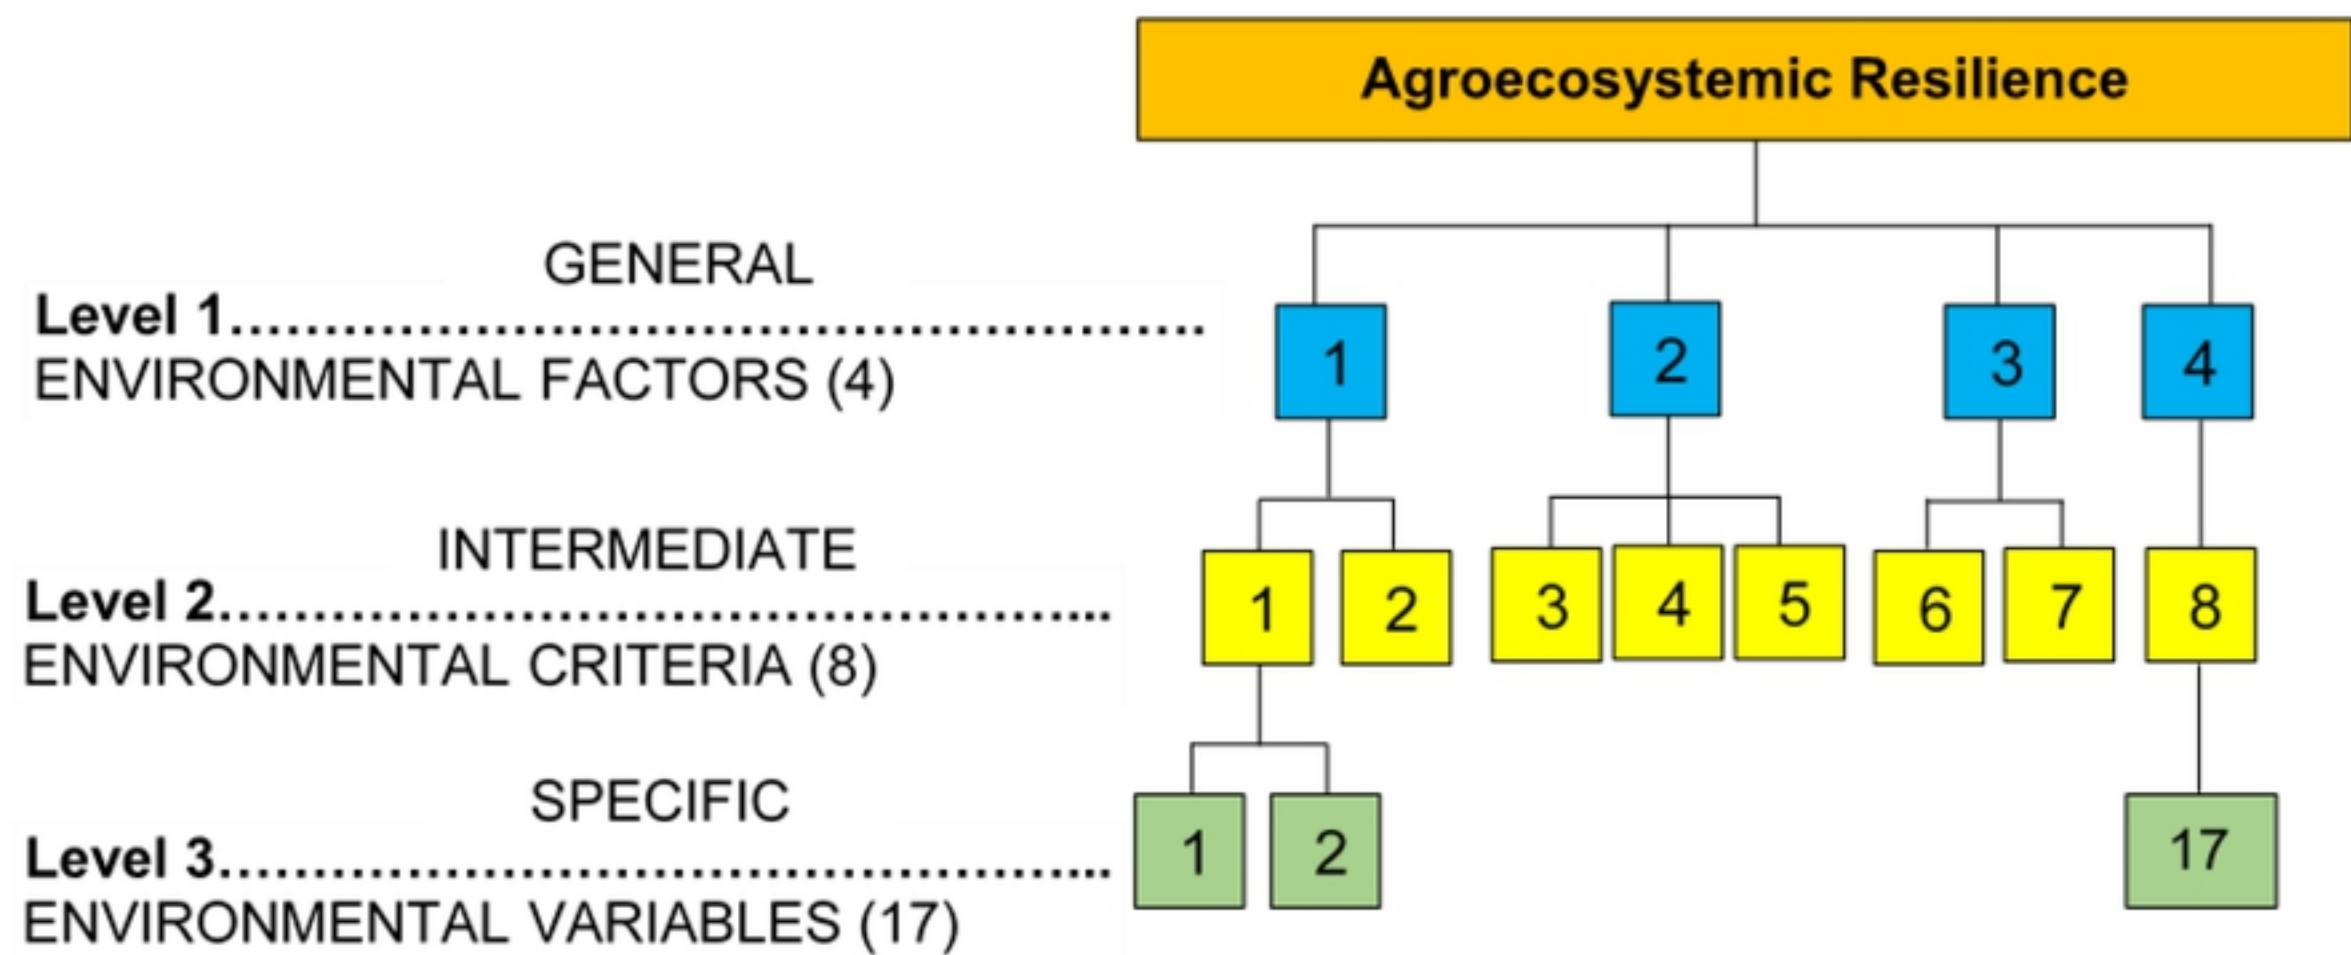

Figure 1.tif

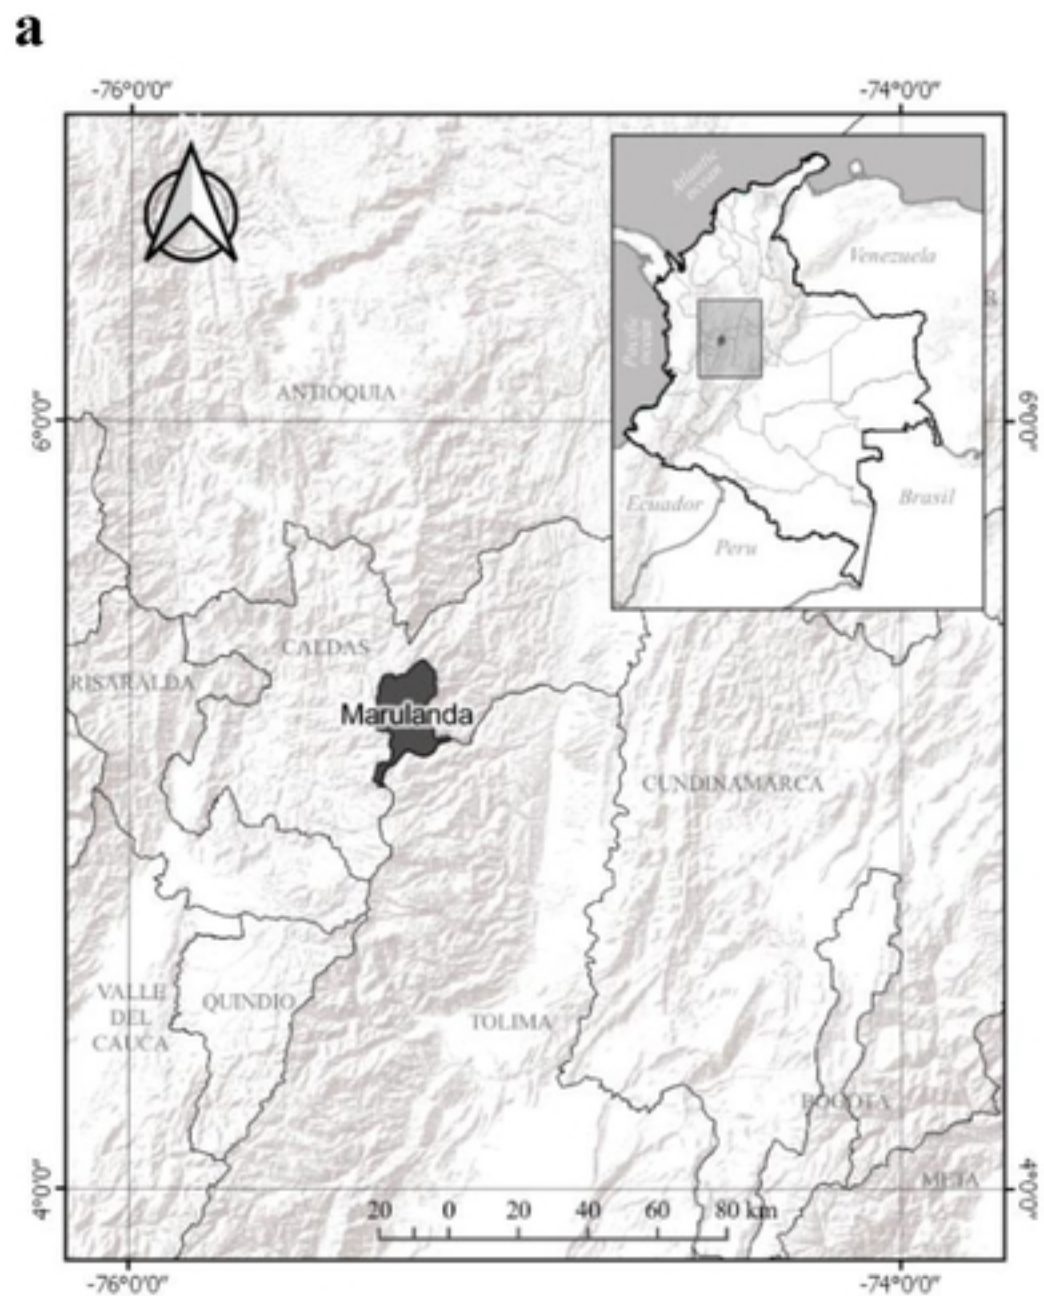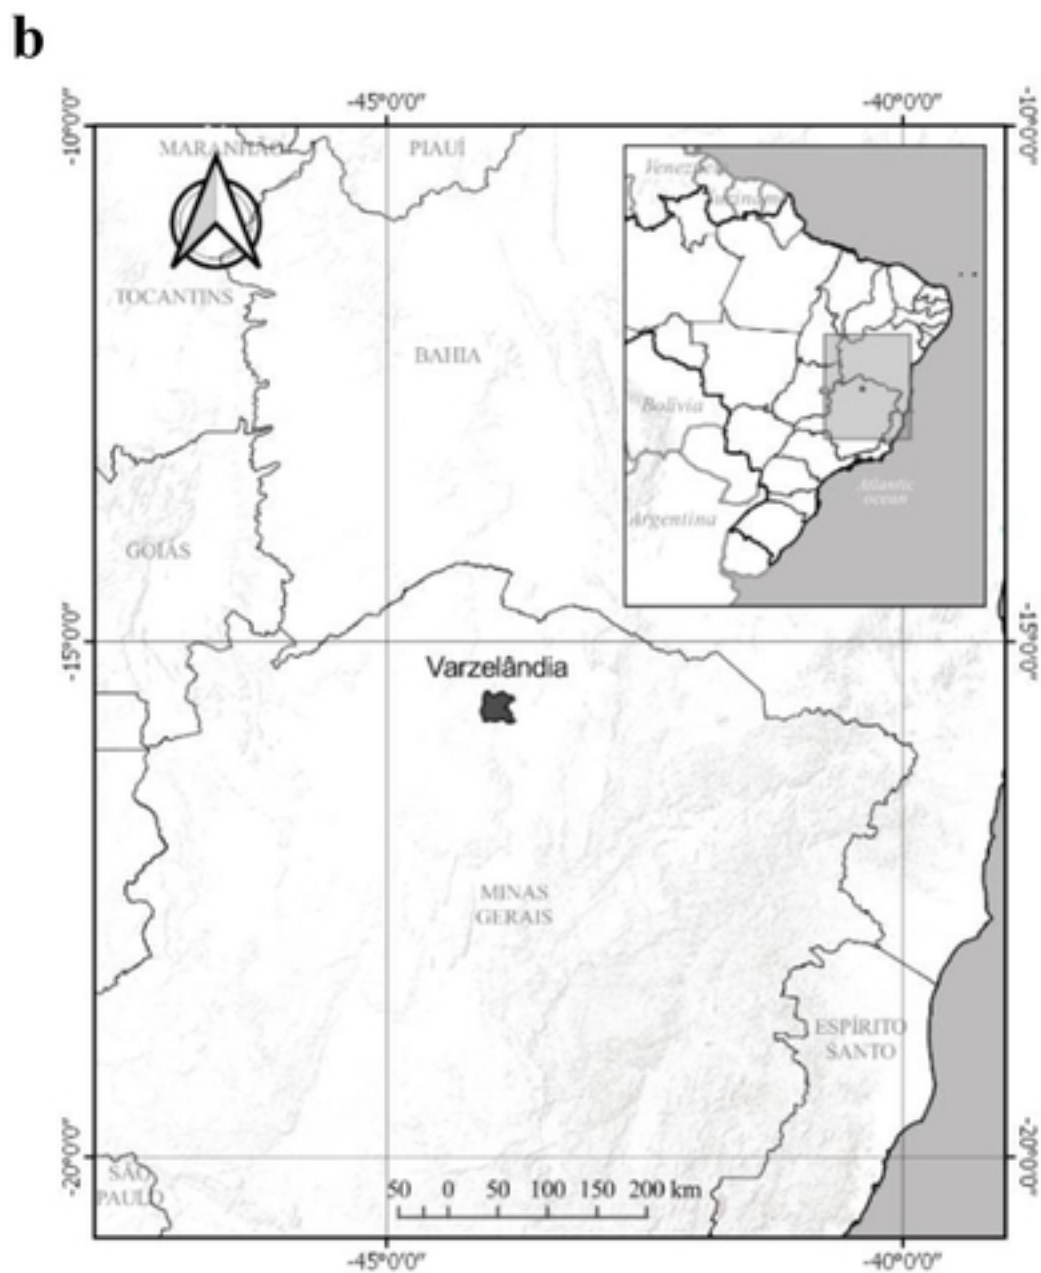

a. Municipality/Town of Marulanda, Departament/State of Caldas, Colombia

b. Municipality/Town of Varzelândia, Department/State of Minas Gerais, Brazil

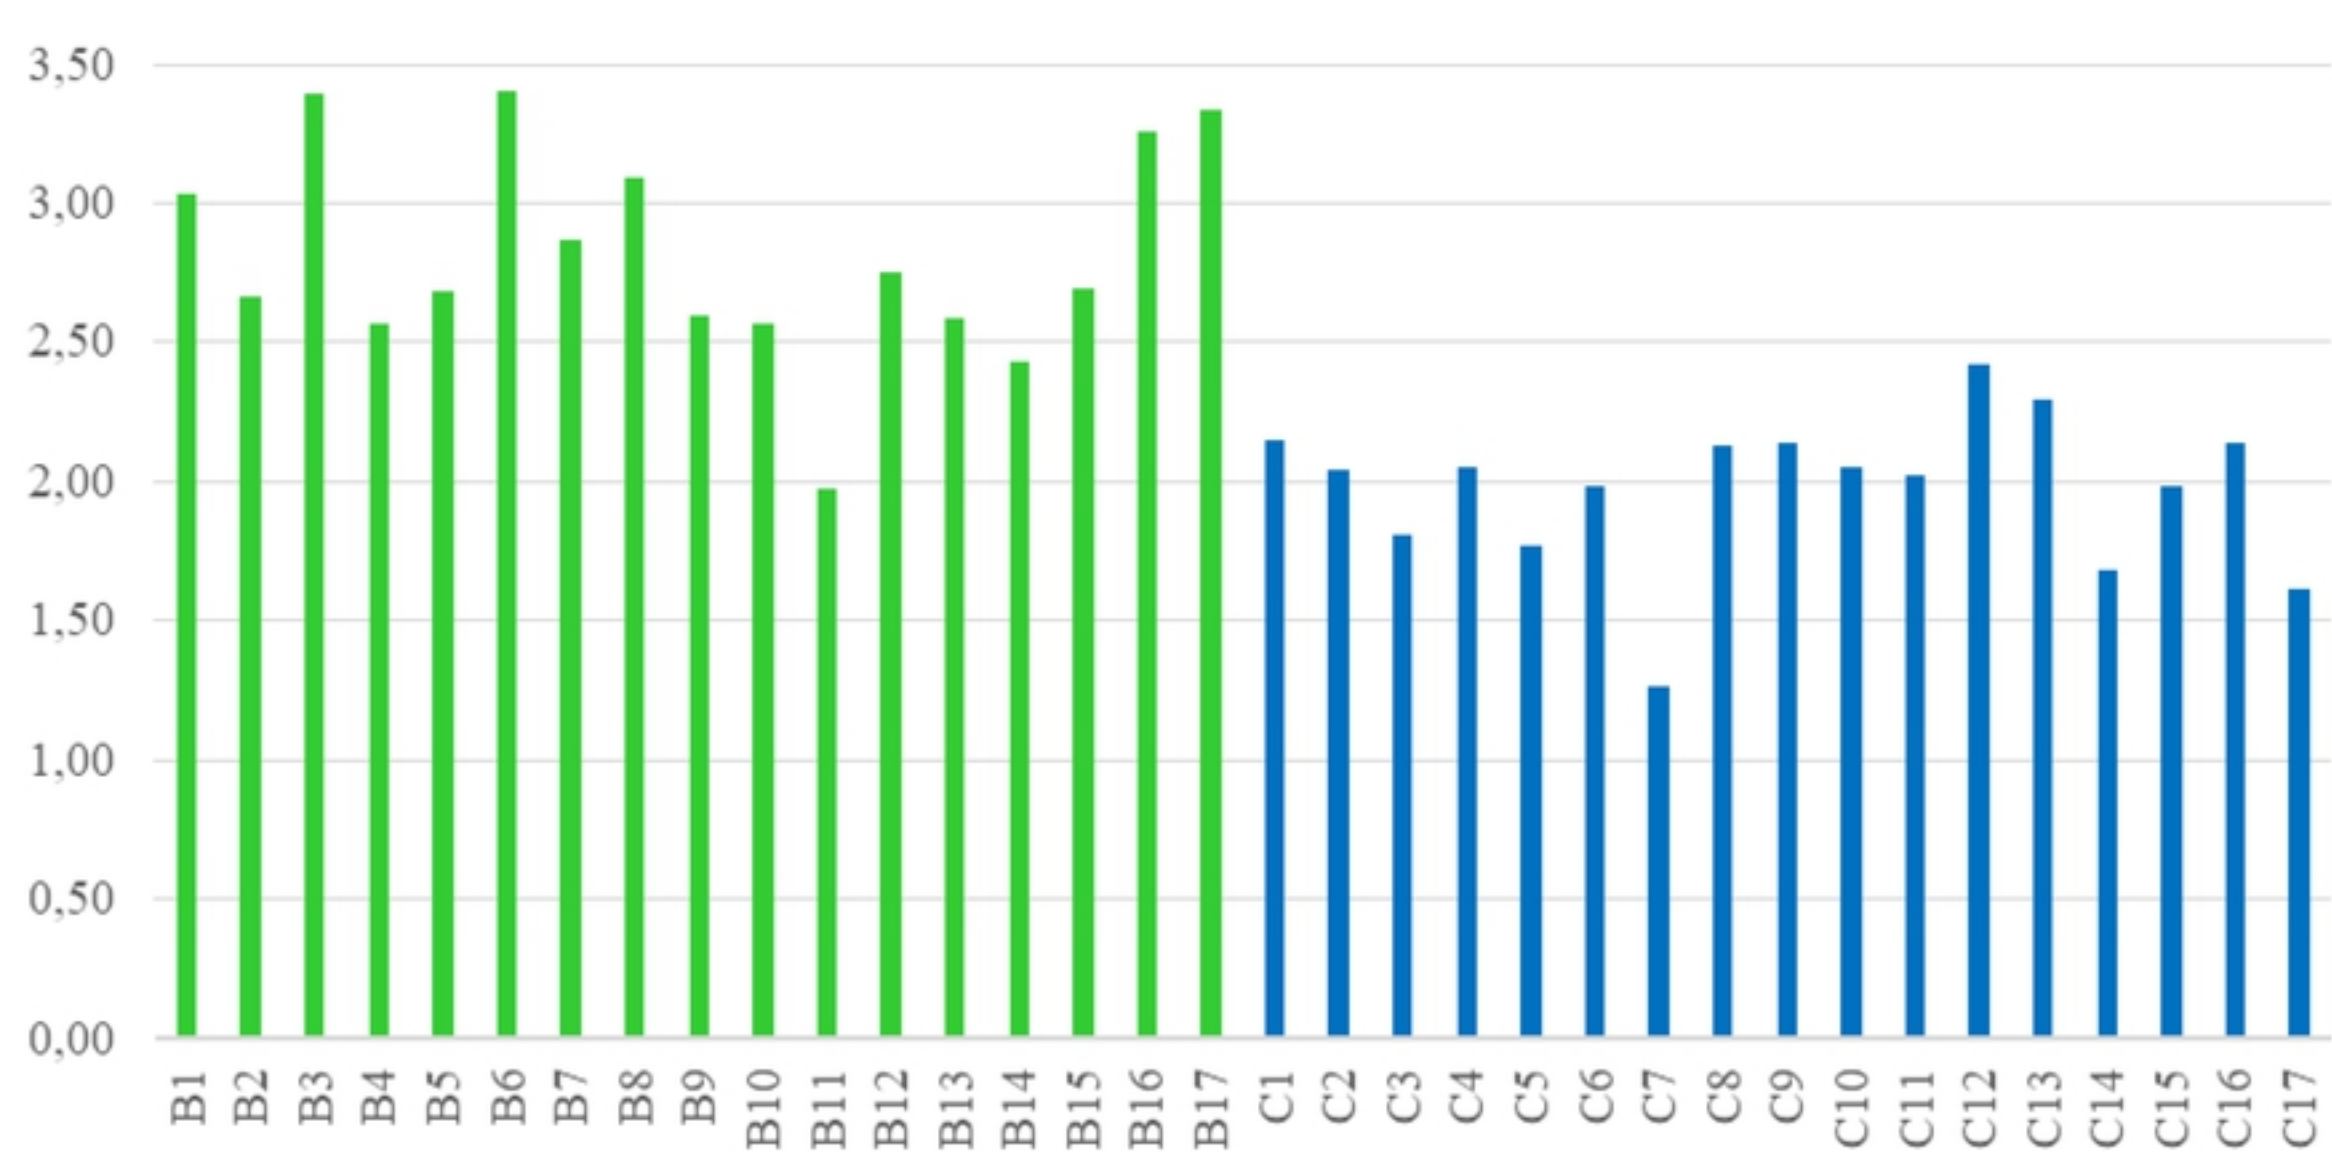

**B:** Brazil. **C:** Colombia

Figure 3.tif



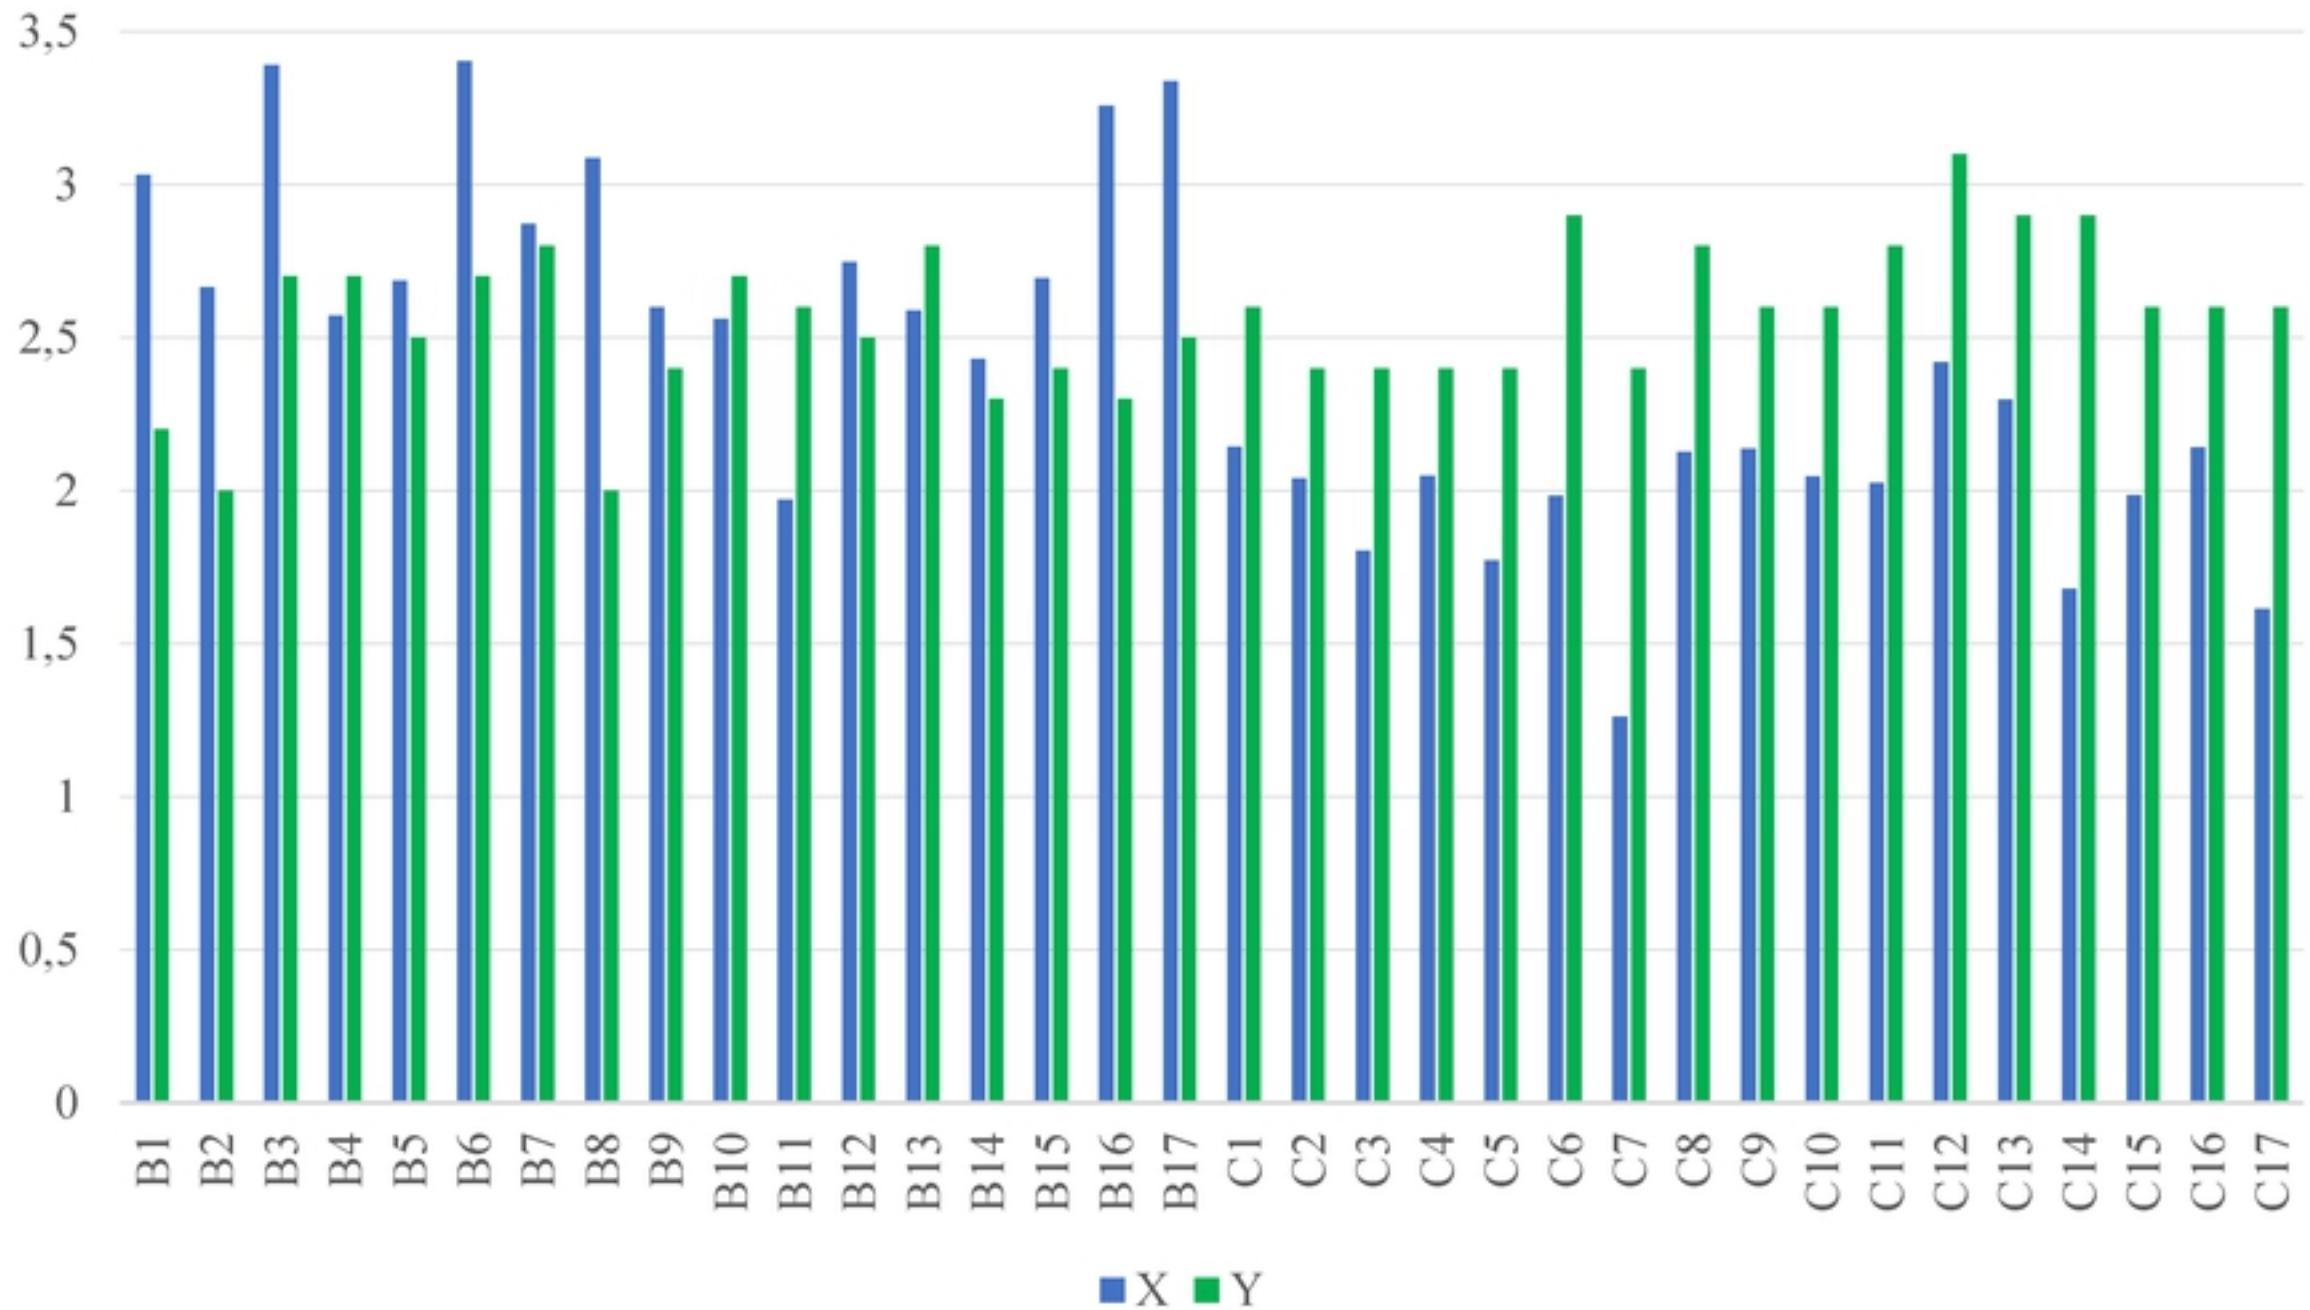

X: Weighted mean of all proposed variables Y: Mean of biophysical variables and management practices

Figure 4.tif
